# Supplementary material for: ZIF-67-derived nanoframes as efficient bifunctional catalysts for overall water splitting in alkaline medium
Source: Royal Society of Chemistry journal article supplement (doi:10.1039/d2dt00828a), 2022-01-01
Supplement: d2dt00828a1.pdf [file d2dt00828a1.pdf]

## Supporting Information

### **The ZIF-67-derived framework as efficient bifunctional catalysts for overall water splitting in alkaline medium**

Wenhao Liao<sup>[a]</sup>, Xianfeng Tong<sup>[a]</sup>, Yali Zhai<sup>[b]</sup>, Haojiang Dai<sup>[a]</sup>, Yingyan Fu<sup>[a]</sup>, Min Qian<sup>[a]</sup>, Geng Wu<sup>[c]</sup>, Tianyun Chen\*<sup>[a]</sup> and Qinghua Yang\*<sup>[b]</sup>

[a]School of Chemistry and Chemical Engineering, Hefei University of Technology, Hefei, Anhui, 230009, China, E-mail address: t-y99@163.com

[b]School of Food and Biological Engineering, Hefei University of Technology, Hefei, Anhui, 230009, China, E-mail address: yqhsina@126.com

[c]School of Chemistry and Materials Science, University of Science and Technology of China, Hefei, Anhui, 230026, China

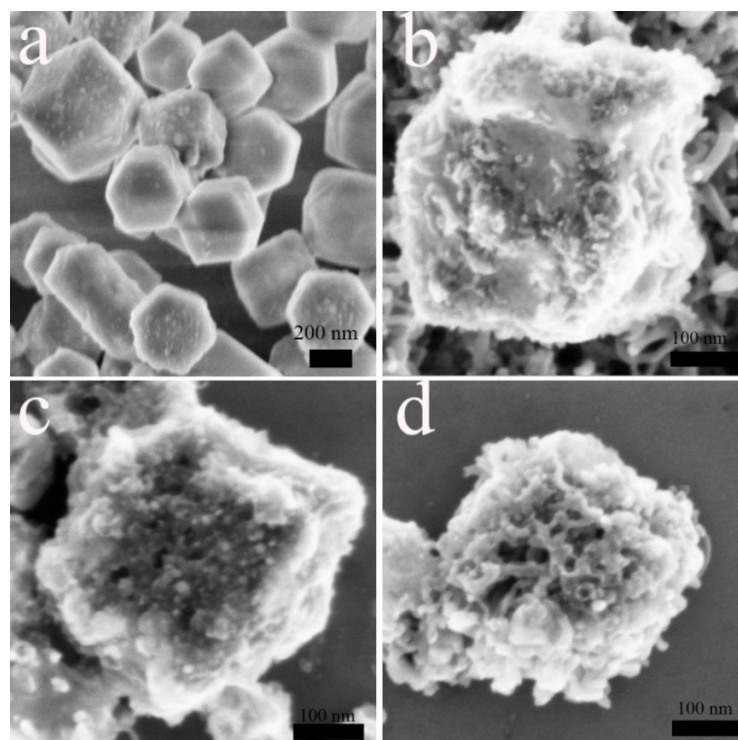

Fig. S1 SEM images of (a) ZIF-67, (b) CoP/CNTs, (c) Co@Co(OH)<sub>2</sub>, (d) CoP/HPs

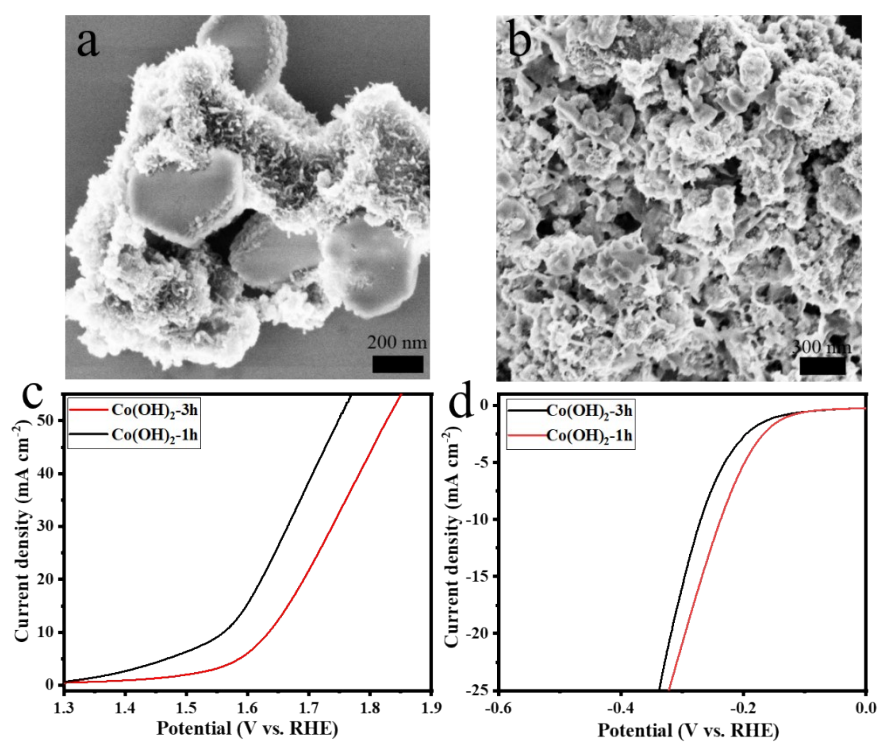

Fig. S2 SEM images of (a) Co(OH)<sub>2</sub>-1h, (b) Co(OH)<sub>2</sub>-3h, (c, d) LSV curves

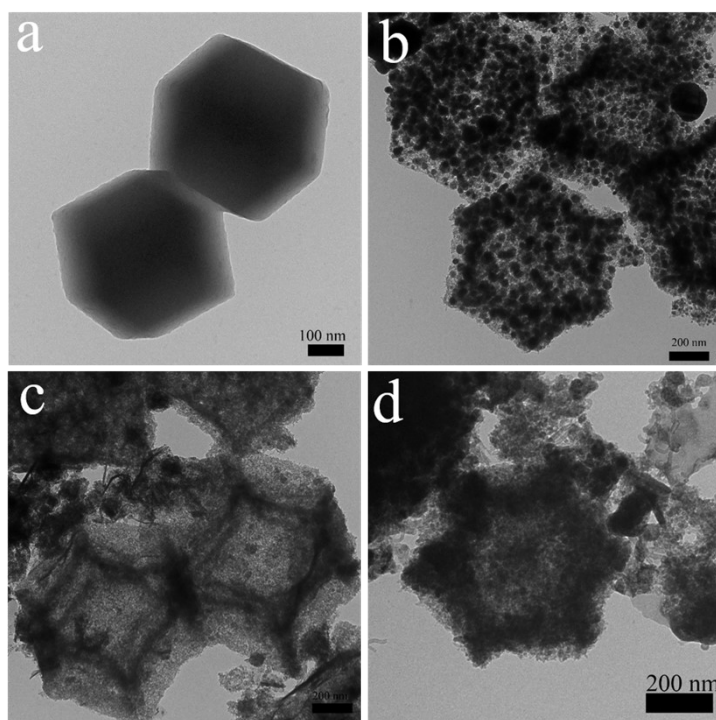

Fig. S3 TEM images of (a) ZIF-67, (b) Co/CNTs, (c) Co@Co(OH)<sub>2</sub>/CNTs, (d) CoP/CNTHPs.

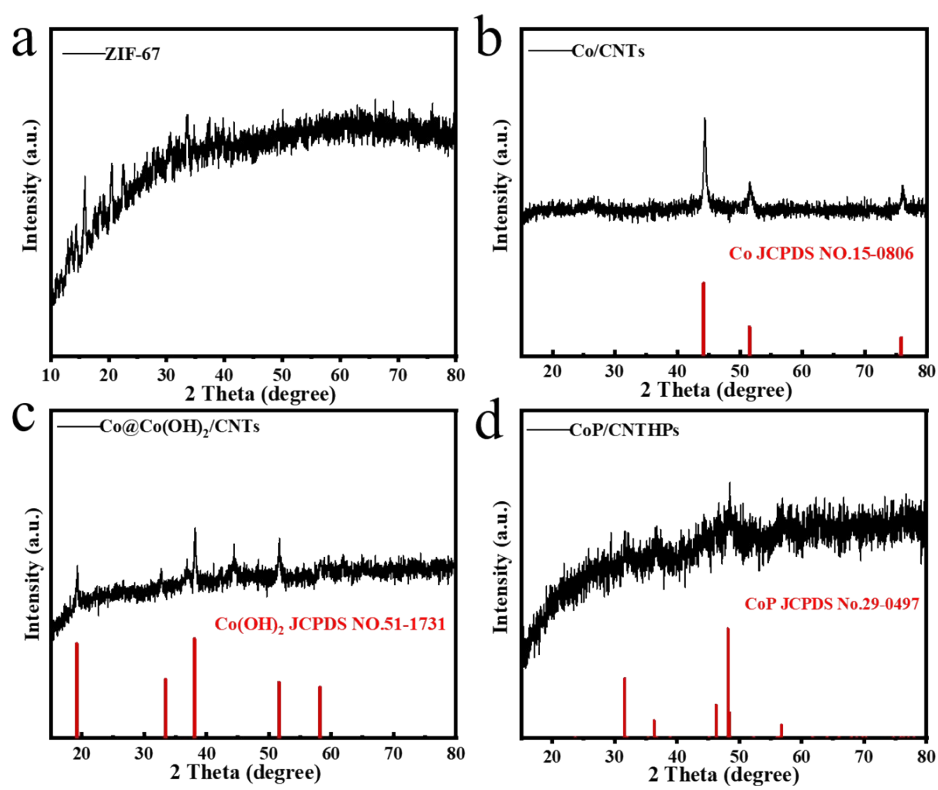

Fig. S4 XRD patterns of (a) ZIF-67, (b) Co/CNTs, (c) Co@Co(OH)<sub>2</sub>/CNTs, (d) CoP/CNTHPs

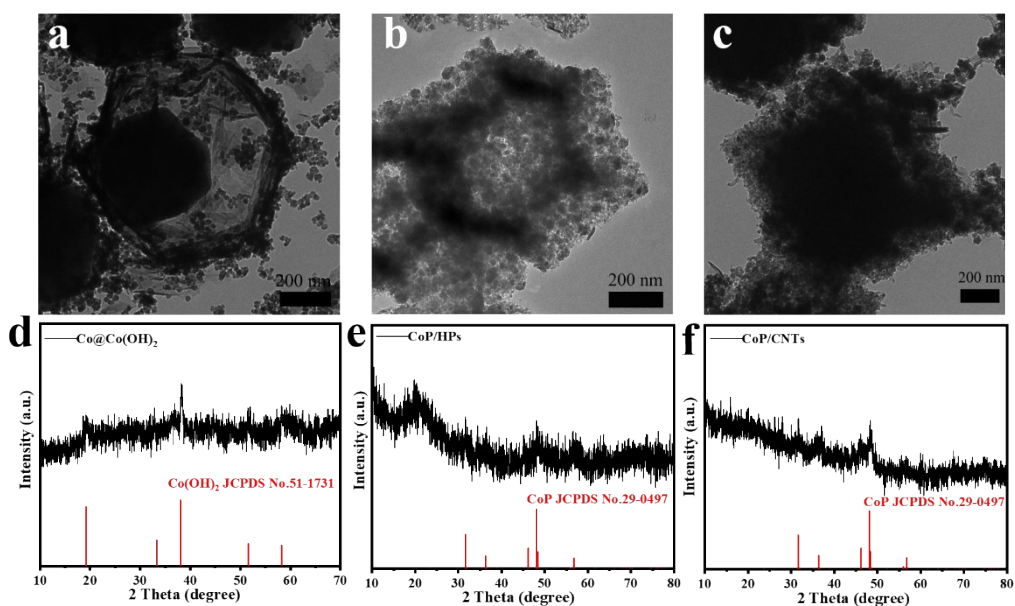

Fig. S5 TEM images and XRD patterns of (a,d) Co@Co(OH)<sub>2</sub>, (b,e) CoP/HPs, (c,f) CoP/CNTs

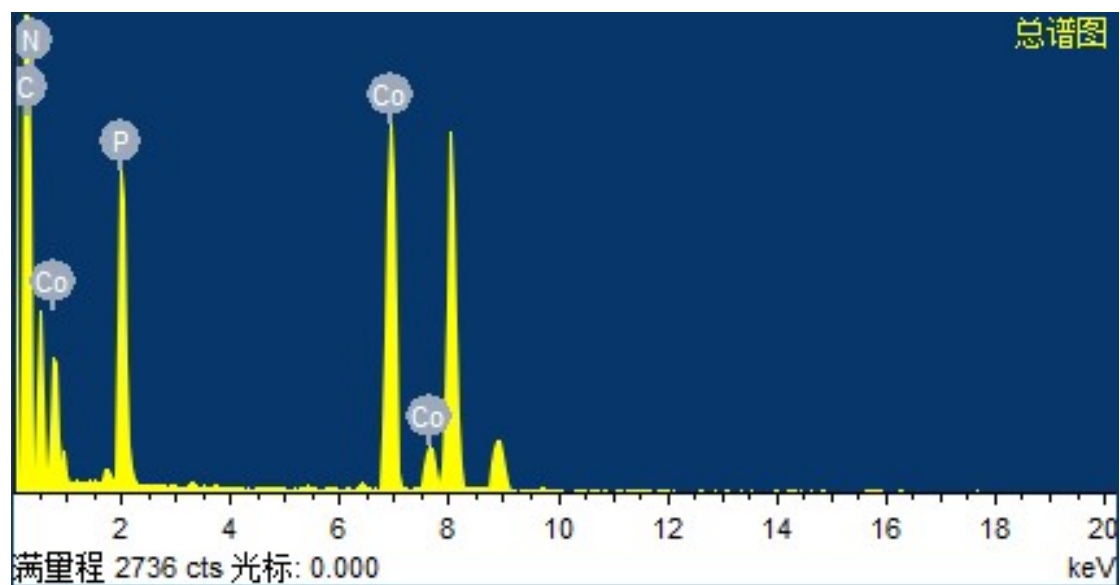

Fig. S6 Energy dispersive X-ray spectroscopy (EDX) of CoP/CNTHPs

Table. S1 The weight and atomic percentage of different elements in CoP/CNTHPs

| Element | Wt.%  | At.%  |
|---------|-------|-------|
| Co      | 20.92 | 6.08  |
| P       | 16.14 | 8.93  |
| C       | 47.65 | 68.94 |
| N       | 1.79  | 1.6   |
| O       | 13.50 | 14.45 |

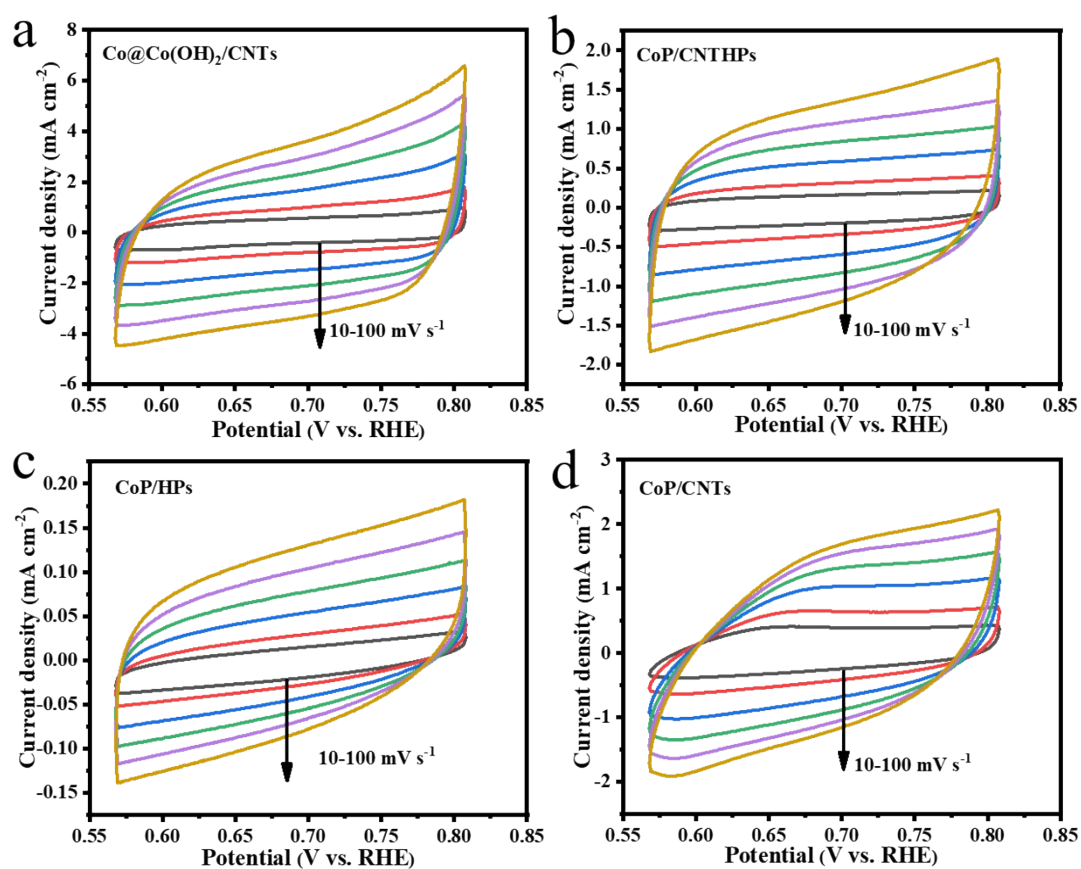

Fig. S7 Cyclic voltammety curves (CVs) of (a) Co@Co(OH)<sub>2</sub>/CNTs, (b) CoP/CNTHPs, (c) CoP/HPs and (d) CoP/CNTs measured in 1.0 M KOH solution at scan rates of 10-100 mV s<sup>-1</sup> for HER

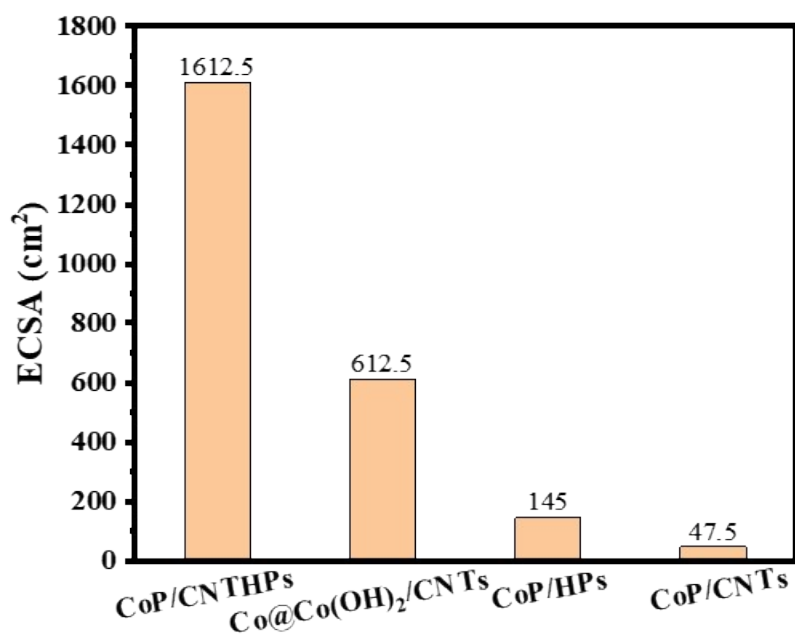

Fig. S8 The electrochemical surface area (ECSA) of CoP/CNTHPs, Co@Co(OH)<sub>2</sub>/CNTs, CoP/HPs and CoP/CNTs for HER

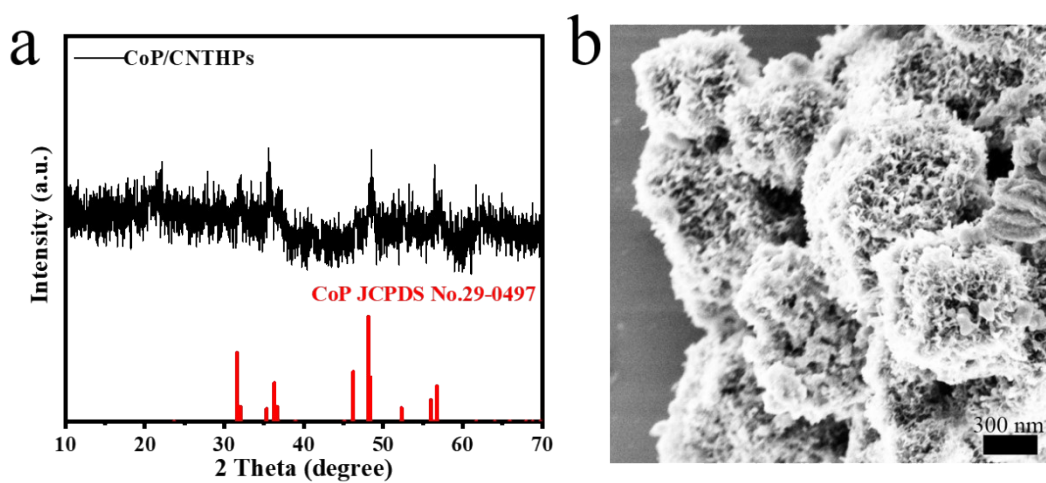

Fig. S9 (a) XRD pattern and (b) SEM image of CoP/CNTHPs after HER test



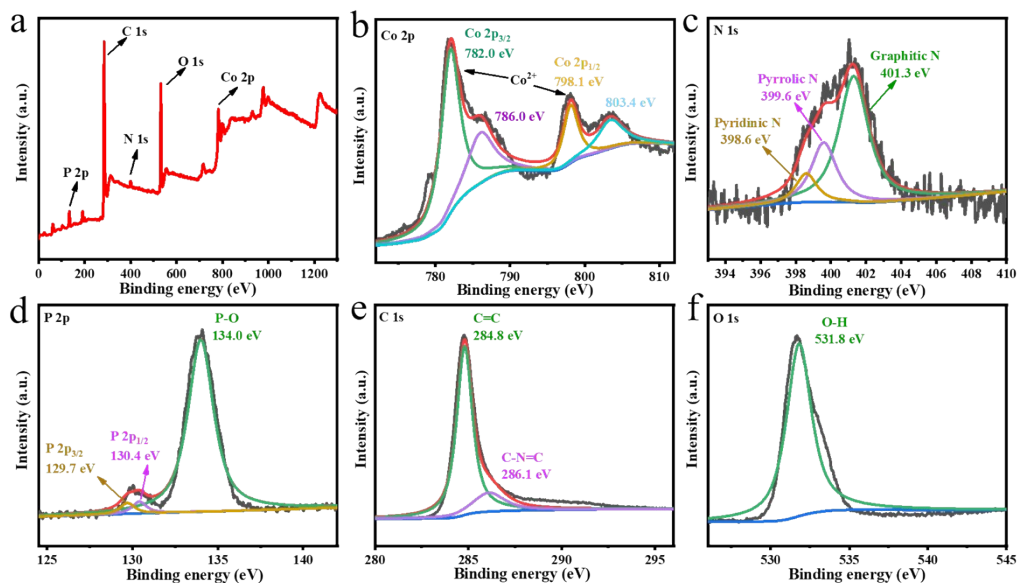

Fig. S10 XPS spectra of CoP/CNTHPs after HER durability test (a) survey, (b) Co 2p, (c) N 1s, (d) P 2p, (e) C 1s and (f) O 1s

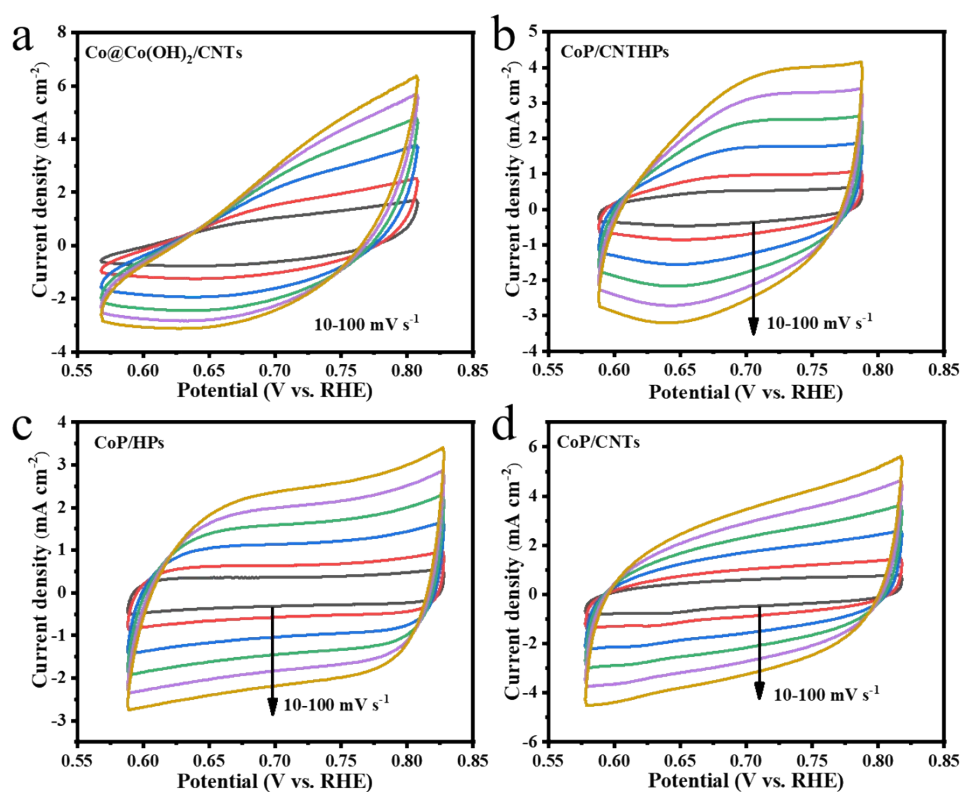

Fig. S11 Cyclic voltammetry curves (CVs) of (a) Co@Co(OH)<sub>2</sub>/CNTs, (b) CoP/CNTHPs (c) CoP/HPs and (d) CoP/CNTs measured in 1.0 M KOH solution at scan rates of 10-100 mV s<sup>-1</sup> for OER

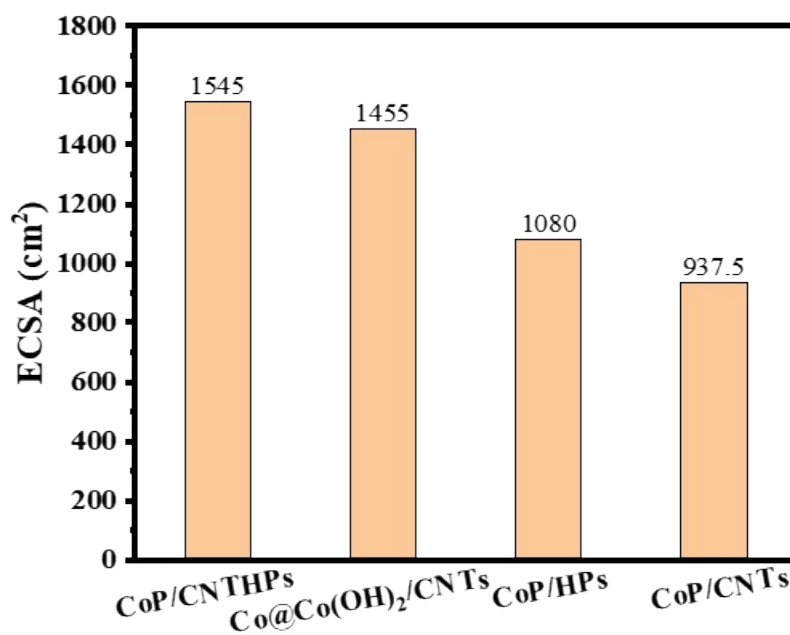

Fig. S12 The electrochemical surface area (ECSA) of CoP/CNTHPs, Co@Co(OH)<sub>2</sub>/CNTs, CoP/HPs and CoP/CNTs for OER

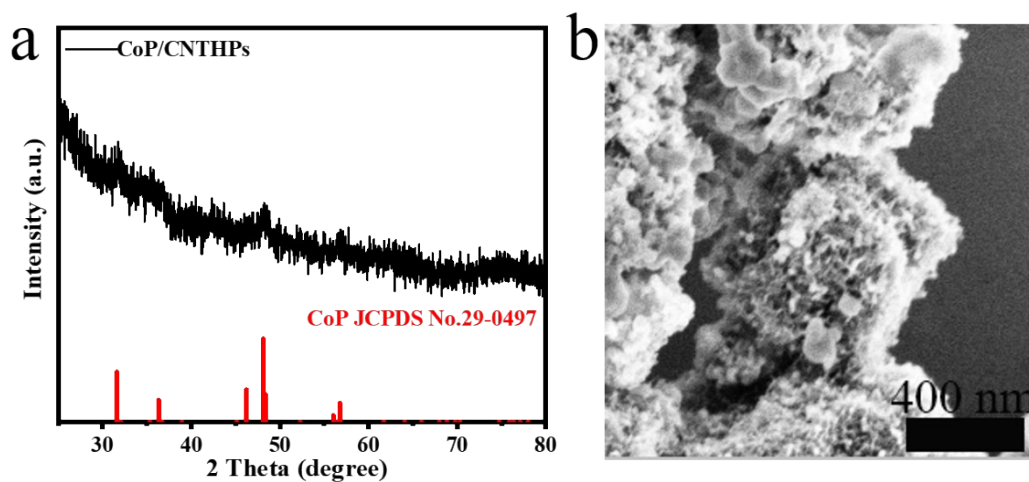

Fig. S13 (a) XRD pattern and (b) SEM image of CoP/CNTHPs after OER test



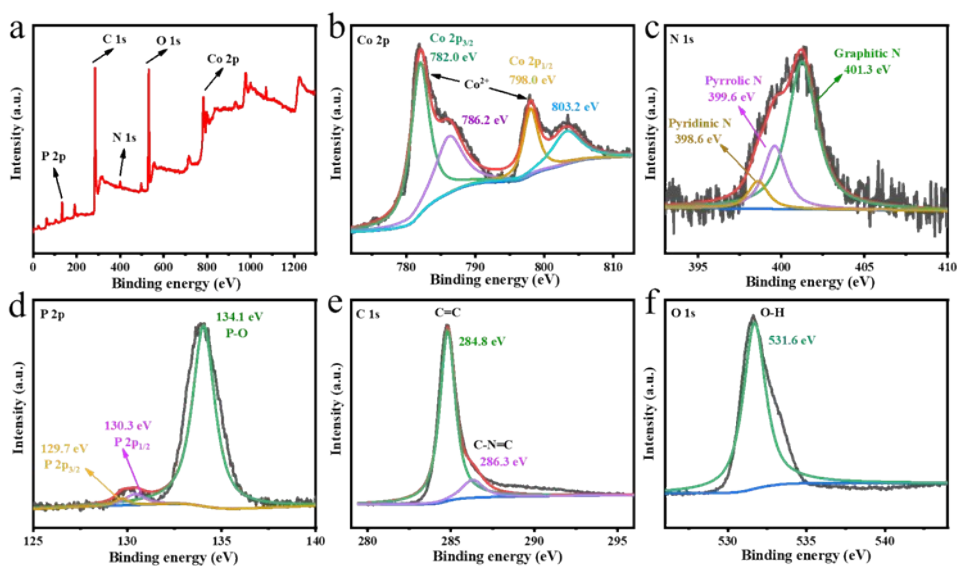

Fig. S14 XPS spectra of CoP/CNTHPs after OER durability test (a) survey, (b) Co 2p, (c) N 1s, (d) P 2p, (e) C 1s and (f) O 1s

Table. S2 Comparison of the overpotentials at 10 mA cm<sup>-2</sup> compared to previously reported catalysts in 1.0 M KOH electrolyte for HER

| Electrocatalysts | Electrolyte | $\eta_{10}$<br>(mV) | Tafel slope<br>(mV dec <sup>-1</sup> ) | Reference |
|------------------|-------------|---------------------|----------------------------------------|-----------|
| CoP/CNTHPs       | 1.0M KOH    | 147                 | 78.1                                   | This work |
| CoP/CNFs         | 1.0M KOH    | 225                 | 100.8                                  | [1]       |
| CoP(C/Z)         | 1.0M KOH    | 154                 | 85.1                                   | [2]       |
| CoP/C NPs        | 1.0M KOH    | 138                 | 95                                     | [3]       |
| CoP-NPC          | 1.0M KOH    | 318                 | 97.5                                   | [4]       |
| Co@PCM           | 1.0M KOH    | 177                 | 151.8                                  | [5]       |
| CoP@NPC-900      | 1.0M KOH    | 181                 | 59                                     | [6]       |
| CoP NS/CNT       | 1.0M KOH    | 68                  | 57                                     | [7]       |
| Zn-Co-P          | 1.0M KOH    | 172                 | 116                                    | [8]       |

Table. S3 Comparison of the overpotentials at 10 mA cm<sup>-2</sup> compared to previously reported catalysts in 1.0 M KOH electrolyte for OER

| Electrocatalysts           | Electrolyte | $\eta_{10}$<br>(mV) | Tafel slope<br>(mV dec <sup>-1</sup> ) | Reference |
|----------------------------|-------------|---------------------|----------------------------------------|-----------|
| CoP/CNTHPs                 | 1.0M KOH    | 238                 | 77.9                                   | This work |
| CoP@HNC                    | 1.0M KOH    | 327                 | 81.3                                   | [9]       |
| CoP@NPCNF                  | 1.0M KOH    | 266                 | 70                                     | [10]      |
| CoP-HNTs@NCL               | 1.0M KOH    | 350                 | 160                                    | [11]      |
| N/Mo-CoP@NPG               | 1.0M KOH    | 201                 | 97.3                                   | [12]      |
| Co <sub>2</sub> P/CoP@NPGC | 1.0M KOH    | 340                 | 116                                    | [13]      |
| CoP/BP                     | 1.0M KOH    | 300                 | 120                                    | [14]      |
| CoP@NC-3/1                 | 1.0M KOH    | 298                 | 68.3                                   | [15]      |
| NC-G-CoP/NF                | 1.0M KOH    | 255                 | 80                                     | [16]      |

Table. S4 Comparison of the overall water splitting performance at 10 mA cm<sup>-2</sup> compared to previously reported catalysts in 1.0 M KOH electrolyte

| Electrocatalysts              | Electrolyte | The overall water<br>splitting(V) | Reference |
|-------------------------------|-------------|-----------------------------------|-----------|
| CoP/CNTHPs                    | 1.0M KOH    | 1.54                              | This work |
| Co <sub>2</sub> P/CoP@Co@NCNT | 1.0M KOH    | 1.56                              | [17]      |
| Co(z)-NiMoS/NF                | 1.0M KOH    | 1.46                              | [18]      |
| Mo <sub>2</sub> N-CoxN        | 1.0M KOH    | 1.53                              | [19]      |
| CoP-InNC@CNT                  | 1.0M KOH    | 1.58                              | [20]      |
| Co@CoP <sub>2</sub> /CF       | 1.0M KOH    | 1.54                              | [21]      |
| CoMnP/Ni <sub>2</sub> P/NF    | 1.0M KOH    | 1.43                              | [22]      |

## References

- [1] X.Q. Xie, J.P. Liu, C. Gu, J. Li, Y. Zhao, C.S. Liu, Hierarchical structured CoP nanosheets/carbon nanofibers bifunctional electrocatalyst for high-efficient overall water splitting, *J. Energy Chem.* 64 (2022) 503-510, <https://doi.org/10.1016/j.jechem.2021.05.020>.

- 
- [2] Y.L. Meng, J. Tang, X. Chen, Z.Y. Niu, Y.H. Zhao, Y. Pan, X.F. Wang, X.Z. Song, Z. Tan, Hierarchical particle-on-sheet CoP fabricated by direct phosphorization of Co(OH)<sub>2</sub>/ZIF-67 hybrid for boosting hydrogen evolution electrocatalysis, *Inorg. Chem. Commun.* 134 (2021) 109058, <https://doi.org/10.1016/j.inoche.2021.109058>.
- [3] Y.R. Li, Y. Zou, Y. Bai, X. Zhang, G. Wang, X. Huang, D. Chen, A novel worm-like micelles@MOFs precursor for constructing hierarchically porous CoP/N-doped carbon networks towards efficient hydrogen evolution reaction, *J. Colloid Inter. Sci.* 600 (2021) 872-881, <https://doi.org/10.1016/j.jcis.2021.05.094>.
- [4] T. Ahamad, M. Naushad, S.M. Alshehri, Fabrication of CoP based nanocomposite as an electrocatalyst for oxygen- and hydrogen-evolving energy conversion reactions, *Mater. Lett.* 278 (2020) 128351, <https://doi.org/10.1016/j.matlet.2020.128351>.
- [5] S.X. Min, W.N. Deng, Y.N. Li, F. Wang, Z.G. Zhang, Self-Supported CoP Nanoparticle-Embedded Wood-Derived Porous Carbon Membrane for Efficient H<sub>2</sub> Evolution in Both Acidic and Basic Solutions, *ChemCatChem.* 12 (2020) 3929-3936, <https://doi.org/10.1002/cctc.202000407>.
- [6] J.Q. Ma, X. Chi, Y.M. Huang, R. Zou, D. Li, Z.Y. Li, X. Li, C. Liu, X. Peng, Biomass-based protic ionic liquid derived N, P, co-doped porous carbon-coated CoP nanocrystals for efficient hydrogen evolution reaction, *J. Mater. Sci.* 56 (2021) 18188-18199, <https://doi.org/10.1007/s10853-021-06235-z>.
- [7] Y. Zhang, Y. Wang, T. Wang, N. Wu, Y. Wang, Y. Sun, L. Fu, Y. Du, W. Zhong,

- 
- Heterostructure of 2D CoP Nanosheets/1D Carbon Nanotubes to Significantly Boost the Alkaline Hydrogen Evolution, *Adv. Mater. Inter.* 7 (2019), <https://doi.org/10.1002/admi.201901302>.
- [8] Y. Jing, H. Liu, R. Yan, J. Chen, H. Dai, C. Liu, X.D. Zhang, Mesoporous CoP Nanowire Arrays for Hydrogen Evolution, *ACS Appl. Nano Mater.* 2 (2019) 5922-5930, <https://doi.org/10.1021/acsanm.9b01353>.
- [9] W. Huang, J. Tang, F. Diao, S. Li, H. Sun, X. Xiao, CoP Nanoparticles Fabricated Through the Nanoscale Kirkendall Effect Immobilized in 3D Hollow Carbon Frameworks for Oxygen Evolution Reaction, *J. Electrochem. Soc.* 168 (2021) 094501, <https://doi.org/10.1149/1945-7111/ac2090>.
- [10] Z.X. Cui, J.X. Lin, J.H. Wu, J.Q. Yu, J.H. Si, Q.T. Wang, N-doped CoP nanoparticles embedded in electrospun N-doped porous carbon nanofiber as high-efficiency oxygen evolution electrocatalysts, *J. Alloy. Compound.* 854 (2021) 156830, <https://doi.org/10.1016/j.jallcom.2020.156830>.
- [11] B. Liu, R.Y. Wang, Y. Yao, J. Ma, Y.B. Sun, J.F. Wan, Y. Zhang, S.Q. Wang, J.L. Zou, Hollow-structured CoP nanotubes wrapped by N-doped carbon layer with interfacial charges polarization for efficiently boosting oxygen reduction/evolution reactions, *Chem. Eng. J.* (2021), <https://doi.org/10.1016/j.cej.2021.133238>.
- [12] K. Li, H.L. Ding, J.J. Zhou, W.W. Wang, P.L. Zhang, L. Wang, J. Wu, Y. Lei, C.C. Zhou, J.Z. Liu, L.Y. Chen, Nitrogen and molybdenum co-doped CoP nanohoneycombs on 3D nitrogen-doped porous graphene as enhanced

- 
- electrocatalyst for oxygen evolution reaction, *Inter. J. Hydrog. Energy*. 46 (2021) 35585-35593, <https://doi.org/10.1016/j.ijhydene.2021.08.132>.
- [13] W.J. Gong, H.Y. Zhang, L. Yang, Y. Yang, J.S. Wang, H. Liang, Core@shell MOFs derived Co<sub>2</sub>P/CoP@NPGC as a highly-active bifunctional electrocatalyst for ORR/OER, *J. Ind. Eng. Chem.* 46 (2021) 35585-35593, <https://doi.org/10.1016/j.jiec.2021.11.032>.
- [14] H. Xiao, X.L. Du, M. Zhao, Y. Li, T.J. Hu, H.S. Wu, J.F. Jia, N.J. Yang, Structural dependence of electrosynthesized cobalt phosphide/black phosphorus pre-catalyst for oxygen evolution in alkaline media, *Nanoscale*. 13 (2021) 7381-7388, <https://doi.org/10.1039/d1nr00062d>.
- [15] Q.Q. Li, J.S. Hu, X.Y. Wang, S.X. Yang, X.H. Huang, X.F. Cheng, Coordination confinement pyrolysis to Flower-like nanocomposites composed of ultrathin nanosheets with embedded ultrasmall CoP nanoparticles for overall water splitting, *Appl. Sur. Sci.* 569 (2021) 151099, <https://doi.org/10.1016/j.apsusc.2021.151099>.
- [16] G.L. Li, L. Li, Z. Lin, CoP-anchored high N-doped carbon@graphene sheet as bifunctional electrocatalyst for efficient overall water splitting, *Inter. J. Hydrog. Energy*. 46 (2021) 18224-18232, <https://doi.org/10.1016/j.ijhydene.2021.02.219>.
- [17] Z.J. Lu, Y.L. Cao, J. Xie, J.D. Hu, K. Wang, D.Z. Jia, Construction of Co<sub>2</sub>P/CoP@Co@NCNT rich-interface to synergistically promote overall water splitting, *Chem. Eng. Jour.* 430 (2022) 132877, <https://doi.org/10.1016/j.cej.2021.132877>.

- 
- [18] H.L. Chen, Z.B. Yu, Y. Hou, R. Jiang, J. Huang, W. Tang, Z. Cao, B. Yang, C. Liu, H. Song, Double MOF gradually activated S bond induced S defect rich MILN-based Co(z)-NiMoS for efficient electrocatalytic overall water splitting, *Nanoscale*. 13 (2021) 20670-20682, <https://doi.org/10.1039/d1nr06556d>.
- [19] H. Guo, A.P. Wu, Y. Xie, H.J. Yan, D.X. Wang, L. Wang, C.G. Tian, 2D porous molybdenum nitride/cobalt nitride heterojunction nanosheets with interfacial electron redistribution for effective electrocatalytic overall water splitting, *J. Mater. Chem. A*. 9 (2021) 8620-8629, <https://doi.org/10.1039/d0ta11997k>.
- [20] L.L. Chai, Z.Y. Hu, X. Wang, Y.W. Xu, L.J. Zhang, T.T. Li, Y. Hu, J.J. Qian, S.M. Huang, Stringing Bimetallic Metal-Organic Framework-Derived Cobalt Phosphide Composite for High-Efficiency Overall Water Splitting, *Adv. Sci.* 7 (2020) 1903195, <https://doi.org/10.1002/advs.201903195>.
- [21] Y.K. Sun, T. Liu, Z.J. Li, G.C. Li, L. Wang, S.X. Li, Morphology and interfacial charge regulation strategies constructing 3D flower-like Co@CoP<sub>2</sub> heterostructure electrocatalyst for efficient overall water splitting, *Chem. Eng. Jour.* (2021), <https://doi.org/10.1016/j.cej.2021.133684>.
- [22] M.Z. Liu, Z. Sun, S.Y. Li, X.W. Nie, Y.F. Liu, E.D. Wang, Z.K. Zhao, Hierarchical superhydrophilic/superaerophobic CoMnP/Ni<sub>2</sub>P nanosheet-based microplate arrays for enhanced overall water splitting, *J. Mater. Chem. A*. 9 (2021) 22129-22139, <https://doi.org/10.1039/d1ta04713b>.
